# Supplementary material for: Identification of CHD1L as an Important Regulator for Spermatogonial Stem Cell Survival and Self‐Renewal
Source: Hindawi journal article supplement (doi:10.1155/2016/4069543), 2016-01-01
Supplement: f1 [file 4069543.f1.pdf]

**Supplemental Table 1** Primers used for quantitative RT-PCR

| primer                         | Sequence                         | Product size (bp) |
|--------------------------------|----------------------------------|-------------------|
| GAPDH forward                  | 5'-GCCTCAAGATCAGCAAT-3'          | 310               |
| <a href="#">GAPDH</a> reversed | 5'-AGGTCCACCACTGACACGTT-3'       |                   |
| Chd11 forward                  | 5'-GACCTGAGTTTGGGTGATG-3'        | 260               |
| Chd1 reversed                  | 5'-CGGATAAGTCGTTCCGGTA-3'        |                   |
| Oct4 forward                   | 5'-GGCGTTCTCTTTGGAAAGGTGTTC-3'   | 302               |
| Oct4 reversed                  | 5'-CTCGAACCACATCCTTCTCT-3'       |                   |
| Nanog forward                  | 5'-GCTGAGATGCCTCACACGGAG-3'      | 163               |
| Nanog reversed                 | 5'-TCTGTTTCTTGACTGGGACCTTGTC-3'  |                   |
| Plzf forward                   | 5'-GTGCCTCGCCATACCAGTGTAC-3'     | 262               |
| Plzf reversed                  | 5'-CCCCTTTTCTTTTCTGTTATTCTTTT-3' |                   |
| Gfra1 forward                  | 5'-GATTACGGAAAGGATGGTCTCG-3'     | 348               |
| Gfra1 reversed                 | 5'-GTTTGGAATTAGCCCTGTAGCA-3'     |                   |
| Bcl6b forward                  | 5'-AAGCCGTATAAGTGTGAGACG-3'      | 257               |
| Bcl6b reversed                 | 5'-AGAATGTGGTAGTGCAC-3'          |                   |
| Lhx1 forward                   | 5'-TTCCCGCAGAACCTGAAGAT-3'       | 195               |
| Lhx1 reversed                  | 5'-CCCCAGAAATGCCAGATTAC-3'       |                   |
| Etv5 forward                   | 5'-AACTTGGTGCTTCATGCTCC-3'       | 281               |
| Etv5 reversed                  | 5'-ACTTAGCACCAAGAGCCTGC-3'       |                   |
| Pou3f forward                  | 5'-GGCACATTTATTCACCAAGACCAG-3'   | 159               |
| Pou3f reversed                 | 5'-TGTGGACCTCAGCAGCATTTGGAT-3'   |                   |

|                |                               |     |
|----------------|-------------------------------|-----|
| Taf4b forward  | 5'-CACTGCCCTTCCTAAACTCGG-3'   | 196 |
| Taf4b reversed | 5'-TTACTTGTGGTCTTGGCTCCTGT-3' |     |

Note: All primers were designed with Beacon designer 2.

**Supplemental Table 2** Antibodies used in experiment

| Antibody                                              | Specificity | Dilution       | Company                  |
|-------------------------------------------------------|-------------|----------------|--------------------------|
| CHD1L                                                 | Rabbit      | 1:50 / 1:300   | Abcam                    |
| PLZF                                                  | mouse       | 1:100 / 1:500  | Santa Cruz Biotechnology |
| GFRA1                                                 | mouse       | 1:100 / 1:500  | Santa Cruz Biotechnology |
| $\beta$ -actin                                        | Rabbit      | - / 1:1000     | Santa Cruz Biotechnology |
| Goat anti-mouse IgG                                   | Goat        | 1:200 / 1:5000 | Santa Cruz Biotechnology |
| goat anti-rabbit IgG                                  | Goat        | 1:200 / 1:5000 | Santa Cruz Biotechnology |
| Alexa Fluor<br>488-conjugated goat<br>anti-rabbit IgG | Goat        | 1:200 / -      | Jackson Immuno Research  |
| Alexa Fluor<br>594-conjugated goat<br>anti-mouse IgG  | Goat        | 1:200 / -      | Jackson Immuno Research  |

Dilution (Immunostaining/Western Blot)

Supplemental Figure 1

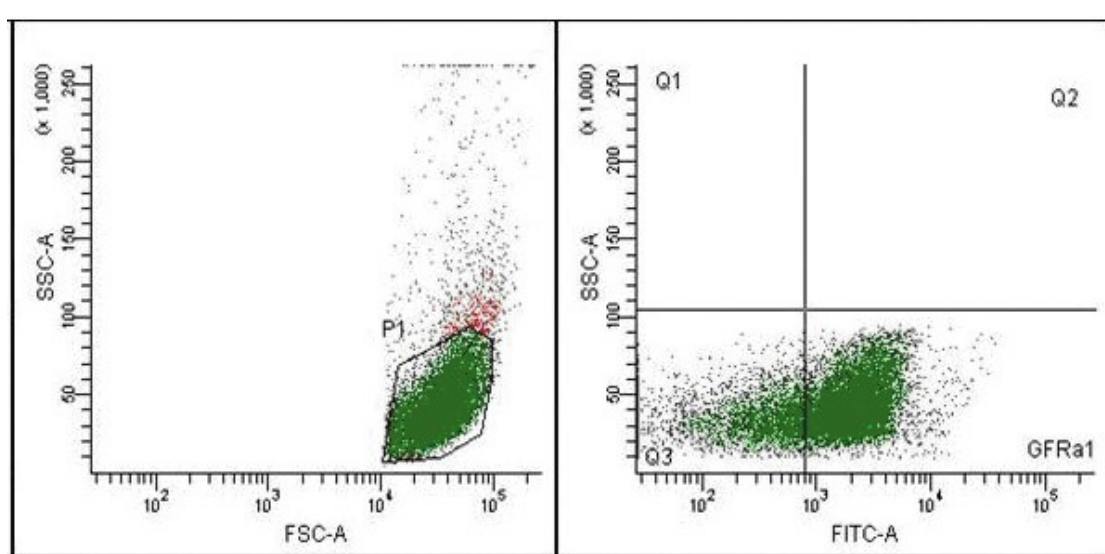

### Supplemental Figure legend

**Figure. S1 Flow cytometric analysis of  $GFR\alpha1$  expression  $CD90^+$  SSCs.** The undifferentiated spermatogonial stem cells were isolated from mouse testis at 5 dpp by using magnetic-activated cell sorting with  $CD90$  conjugated microbeads. Isolated  $CD90^+$  cells were subjected to flow cytometry analyses using antibody against  $GFR\alpha1$  to examine  $GFR\alpha1$  expression on  $CD90^+$  SSCs. Left,  $CD90^+$  cells were gated and counted (green dot). Right,  $GFR\alpha1$  expression in  $CD90^+$  SSCs.
